# Supplementary material for: Discontinuation of antidepressants after remission with antidepressant medication in major depressive disorder: a systematic review and meta-analysis
Source: PubMed Central journal article supplement (PMC7815511; doi:10.1038/s41380-020-0843-0), 2020-07-23
Supplement: 41380_2020_843_MOESM4_ESM.pdf [file 41380_2020_843_MOESM4_ESM.pdf]

|                   | Random sequence generation (selection bias) | Allocation concealment (selection bias) | Blinding of participants and personnel (performance bias) | Blinding of outcome assessment (detection bias) | Incomplete outcome data (attrition bias) |
|-------------------|---------------------------------------------|-----------------------------------------|-----------------------------------------------------------|-------------------------------------------------|------------------------------------------|
| Boulenger_2012    | +                                           | +                                       | +                                                         | +                                               | ?                                        |
| Cheung 2008       | +                                           | ?                                       | +                                                         | +                                               | -                                        |
| Dalery 2001       | ?                                           | ?                                       | +                                                         | +                                               | +                                        |
| Dekker 2000       | ?                                           | +                                       | +                                                         | +                                               | +                                        |
| Dobson 2008       | ?                                           | ?                                       | +                                                         | +                                               | -                                        |
| Doogan1992        | ?                                           | ?                                       | +                                                         | +                                               | +                                        |
| Emslie 2004       | +                                           | ?                                       | +                                                         | +                                               | +                                        |
| Emslie 2008       | +                                           | ?                                       | +                                                         | +                                               | +                                        |
| FAVA 2006         | ?                                           | ?                                       | +                                                         | +                                               | -                                        |
| Feiger 1999       | ?                                           | ?                                       | +                                                         | +                                               | +                                        |
| Gilaberte 2001    | ?                                           | ?                                       | +                                                         | +                                               | -                                        |
| Goodwin 2009      | ?                                           | ?                                       | +                                                         | +                                               | -                                        |
| Goodwin2013       | ?                                           | ?                                       | +                                                         | +                                               | -                                        |
| Gorwood 2007      | ?                                           | ?                                       | +                                                         | +                                               | -                                        |
| Hochstrasser 2001 | ?                                           | ?                                       | +                                                         | +                                               | +                                        |
| Keller 1998       | ?                                           | ?                                       | +                                                         | +                                               | +                                        |
| Klysner 2002      | ?                                           | ?                                       | +                                                         | +                                               | +                                        |
| Kosis 2007        | ?                                           | ?                                       | +                                                         | +                                               | +                                        |
| McGrath 2006      | +                                           | ?                                       | +                                                         | +                                               | +                                        |
| Montgomery 1993a  | ?                                           | ?                                       | +                                                         | +                                               | +                                        |
| Montgomery 1993b  | ?                                           | ?                                       | +                                                         | +                                               | +                                        |
| Montgomery 2004   | ?                                           | ?                                       | +                                                         | +                                               | +                                        |
| Perahia 2009      | ?                                           | ?                                       | +                                                         | +                                               | +                                        |
| Rapaport 2004     | ?                                           | ?                                       | +                                                         | +                                               | +                                        |
| Reimherr 1998     | ?                                           | ?                                       | +                                                         | +                                               | +                                        |
| Rickels 2010      | ?                                           | ?                                       | +                                                         | +                                               | +                                        |
| Robert 1995       | ?                                           | ?                                       | +                                                         | +                                               | ?                                        |
| Rosenthal 2013    | ?                                           | ?                                       | +                                                         | +                                               | +                                        |
| Rouillon_2000     | ?                                           | ?                                       | +                                                         | ?                                               | -                                        |
| Schmidt 2000      | ?                                           | ?                                       | +                                                         | +                                               | +                                        |
| Segal 2010        | +                                           | ?                                       | +                                                         | +                                               | +                                        |
| Shiovitz 2014     | +                                           | +                                       | +                                                         | +                                               | +                                        |
| Simon 2004        | ?                                           | ?                                       | +                                                         | +                                               | -                                        |
| Stein 1980        | ?                                           | ?                                       | +                                                         | +                                               | ?                                        |
| Stewart 1997      | ?                                           | ?                                       | +                                                         | +                                               | +                                        |
| Terra 1998        | ?                                           | ?                                       | +                                                         | +                                               | +                                        |
| Thase 2001        | ?                                           | ?                                       | +                                                         | +                                               | +                                        |
| Versiani 1999     | ?                                           | ?                                       | +                                                         | +                                               | +                                        |
| Weihls 2002       | ?                                           | ?                                       | +                                                         | +                                               | ?                                        |
| Wilson 2003       | +                                           | +                                       | +                                                         | +                                               | -                                        |
