# Supplementary material for: Discontinuation of antidepressants after remission with antidepressant medication in major depressive disorder: a systematic review and meta-analysis
Source: PubMed Central journal article supplement (PMC7815511; doi:10.1038/s41380-020-0843-0), 2020-07-23

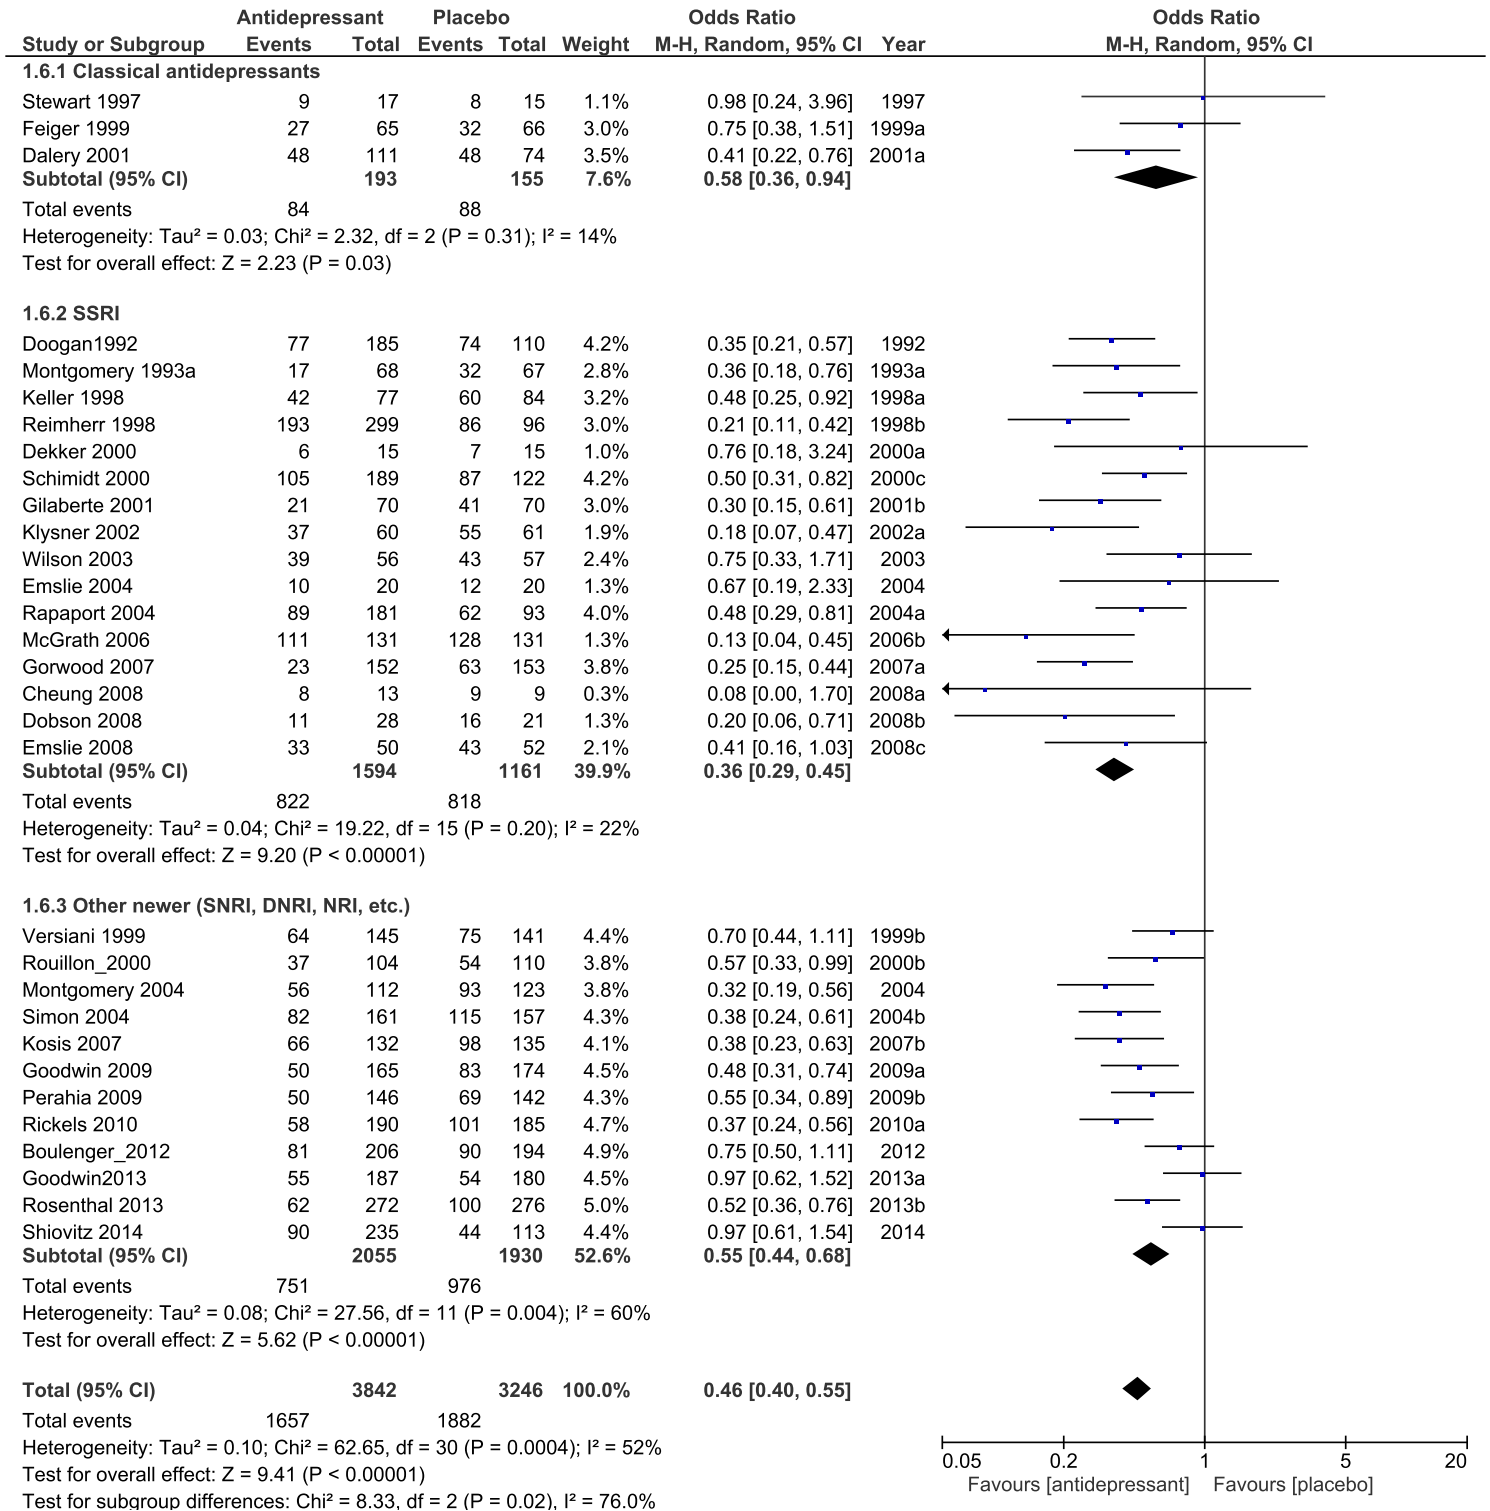

Supplement: 41380_2020_843_MOESM7_ESM.pdf [file 41380_2020_843_MOESM7_ESM.pdf]
